# Supplementary material
Source: Springer Nature journal article supplement (https://www.springermedizin.de/resource/supplementary/12895_2009_102_MOESM2_ESM.pdf/9514106)
Supplement: MOESM2 [file 9514106]

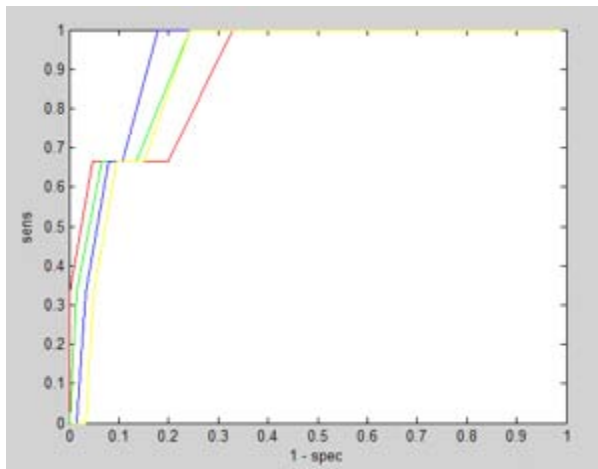

**ROC curves for the diagnosis of melanoma after removal of lesions classified on SIAscopy as haemangioma or seborrhoeic keratosis. Red = Moncrieff Scoring System (MSS); green = MSS +1 point for blood vessels; blue = MSS + 2 points for blood vessels; yellow = MSS +3 points for blood vessels.**

**Area under curve: Red = 0.892; green = 0.912; blue = 0.916; yellow = 0.887.**
